# Supplementary material for: MFG-E8 Drives Melanoma Growth by Stimulating Mesenchymal Stromal Cell–Induced Angiogenesis and M2 Polarization of Tumor-Associated Macrophages
Source: Oxford University Press journal article supplement (doi:10.1158/0008-5472.can-15-2812), 2016-05-17
Supplement: 00085472can152812-sup-156502_1_supp_data_3421667_w4nnwm.pdf [file 00085472can152812-sup-156502_1_supp_data_3421667_w4nnwm.pdf]

### **Supplemental Figure S1.**

A. Proliferation in MSC derived from BM in WT mice cultured under normoxia or hypoxia condition for 48 hours. Values were determined in 3 independent experiments and normalized to the extent of proliferation in MSC cultured under normoxia condition. B. Quantification of mRNA levels of MFG-E8 in MSC cultured under normoxia or hypoxia condition for 48 hours by quantitative reverse transcriptase-PCR (RT-PCR). mRNA levels in MSC cultured under normoxia condition was assigned a value of 1. Values were determined in 3 independent experiments. \* $P < 0.05$ .

### **Supplemental Figure S2.**

A. The amount of CD68<sup>+</sup> macrophages in melanoma tumor in mice treated with clodronate liposomes or control liposomes. Data are representative of n=3 experiments. Scale bar = 100  $\mu\text{m}$ . B. Survival in mice implanted with melanoma cells and MFG-E8 WT/KO MSC treated with clodronate liposomes or control liposomes (n=10 for each time points and groups).
